# Supplementary material for: Comprehensive RNA-Seq Data Analysis Identifies Key mRNAs and lncRNAs in Atrial Fibrillation
Source: Front Genet. 2019 Oct 2;10:908. doi: 10.3389/fgene.2019.00908 (PMC6783610; doi:10.3389/fgene.2019.00908)
Supplement: Supplementary file 1 [file Table_1.xlsx]

## Sheet: Supplementary Table S1
Table S1. The differentially expressed genes
gene id	gene symbol	biotype	pvalue	log2FC
ENSG00000157933.9	SKI	protein_coding	0.0404188	-1.10982
ENSG00000116273.5	PHF13	protein_coding	0.00828558	-1.02807
ENSG00000227950.1	RP11-312B8.2	pseudogene	0.00388206	-2.83242
ENSG00000236269.1	ENO1-IT1	sense_intronic	0.00745909	-1.29631
ENSG00000233268.3	RP11-558F24.2	pseudogene	0.0198501	-1.61734
ENSG00000116663.6	FBXO6	protein_coding	0.0303756	1.51502
ENSG00000236936.1	RP3-329E20.2	antisense	0.00515961	-2.09291
ENSG00000231105.1	RP5-1071N3.1	antisense	0.00624889	-1.69148
ENSG00000175793.10	SFN	protein_coding	0.00233892	-2.06449
ENSG00000241547.1	RP11-4K3__A.5	pseudogene	0.00914328	-2.15422
ENSG00000130766.4	SESN2	protein_coding	0.00230976	-1.08703
ENSG00000130772.9	MED18	protein_coding	0.016333	1.77824
ENSG00000237329.2	RP11-201O14.1	pseudogene	0.0277775	-1.20199
ENSG00000269967.1	RP11-84A19.4	lincRNA	0.044321	-1.14525
ENSG00000228634.1	RP4-534N18.2	lincRNA	0.0321869	-1.22645
ENSG00000231849.1	UBE2V2P4	pseudogene	0.00653106	-2.31101
ENSG00000163874.8	ZC3H12A	protein_coding	0.00278323	-1.90345
ENSG00000232273.1	FTH1P1	pseudogene	0.00533674	-2.07625
ENSG00000173846.8	PLK3	protein_coding	0.0127081	-1.24028
ENSG00000234329.1	RP11-767N6.2	pseudogene	0.0180522	-1.12605
ENSG00000233406.4	RP11-296A18.5	pseudogene	0.0148786	-1.2866
ENSG00000272175.1	RP4-657D16.6	antisense	0.0312016	1.28289
ENSG00000243725.2	TTC4	protein_coding	0.00631585	1.60608
ENSG00000177606.5	JUN	protein_coding	0.00708791	-1.42477
ENSG00000234784.2	RP11-182I10.1	pseudogene	0.00329744	-2.06991
ENSG00000233877.2	RP11-182I10.2	pseudogene	0.00317598	-1.63787
ENSG00000254685.2	FPGT	protein_coding	2.34473e-06	1.57052
ENSG00000162616.8	DNAJB4	protein_coding	0.0310735	1.2158
ENSG00000117226.7	GBP3	protein_coding	0.00540284	1.42001
ENSG00000117228.9	GBP1	protein_coding	0.0207481	1.94071
ENSG00000116337.11	AMPD2	protein_coding	0.0093873	-1.08915
ENSG00000228703.1	RP5-1160K1.6	antisense	2.45577e-05	-2.33004
ENSG00000121931.11	LRIF1	protein_coding	1.27008e-05	1.32079
ENSG00000162777.12	DENND2D	protein_coding	0.00305891	1.29157
ENSG00000215867.4	KRT18P57	pseudogene	0.00566452	-1.55562
ENSG00000233730.1	RP4-666F24.3	lincRNA	0.00418971	2.16145
ENSG00000177173.5	NAP1L4P1	pseudogene	0.00448866	-1.79012
ENSG00000234998.1	RP11-439A17.10	antisense	0.0485756	1.88922
ENSG00000233029.3	RP11-439A17.9	antisense	0.00791534	1.58471
ENSG00000177144.5	NUDT4P1	pseudogene	0.00425143	1.09162
ENSG00000253193.4	FCGR1C	pseudogene	0.0371857	1.41065
ENSG00000234571.1	RP5-998N21.4	lincRNA	0.0236985	1.73084
ENSG00000233030.2	RP11-196G18.3	antisense	0.0201706	1.83441
ENSG00000183941.8	HIST2H4A	protein_coding	0.00084707	1.04773
ENSG00000182217.7	HIST2H4B	protein_coding	4.13026e-06	1.12549
ENSG00000178096.8	BOLA1	protein_coding	0.00105336	1.75767
ENSG00000143374.10	TARS2	protein_coding	0.031596	1.00827
ENSG00000237781.2	RP11-54A4.2	antisense	0.0476846	1.1164
ENSG00000143457.6	GOLPH3L	protein_coding	0.00186251	1.1106
ENSG00000163154.5	TNFAIP8L2	protein_coding	5.24231e-07	1.81282
ENSG00000143373.13	ZNF687	protein_coding	0.00168817	-1.14275
ENSG00000223599.1	RP11-216N14.7	pseudogene	0.0147188	-1.19921
ENSG00000236327.2	RP11-759F5.1	pseudogene	0.0419137	-1.82205
ENSG00000234937.1	RP11-101O6.2	pseudogene	0.0149841	-1.84234
ENSG00000116604.13	MEF2D	protein_coding	0.0137334	-1.23083
ENSG00000271736.1	RP11-85G21.3	lincRNA	0.0211231	1.24322
ENSG00000180409.2	OR10AA1P	pseudogene	0.0109964	1.08807
ENSG00000163565.14	IFI16	protein_coding	0.0115934	1.68477
ENSG00000163568.9	AIM2	protein_coding	0.00666596	2.22671
ENSG00000235082.2	SUMO1P3	pseudogene	0.0482057	-1.11595
ENSG00000158874.7	APOA2	protein_coding	0.0284783	-1.67099
ENSG00000173110.6	HSPA6	protein_coding	0.00637581	1.18643
ENSG00000269887.1	RP11-477H21.2	sense_intronic	0.0307102	1.69532
ENSG00000272033.1	RP11-52A20.2	sense_intronic	0.0229972	-1.12555
ENSG00000171806.7	METTL18	protein_coding	0.0178866	1.17448
ENSG00000000457.9	SCYL3	protein_coding	0.000682509	1.06246
ENSG00000010165.15	METTL13	protein_coding	0.0033993	1.58558
ENSG00000135845.5	PIGC	protein_coding	0.00824785	1.79482
ENSG00000117560.6	FASLG	protein_coding	0.031475	1.82703
ENSG00000236535.1	RC3H1-IT1	sense_intronic	0.0256005	-1.06639
ENSG00000235750.5	KIAA0040	protein_coding	0.0207751	1.16523
ENSG00000135828.7	RNASEL	protein_coding	6.94326e-07	2.01807
ENSG00000121486.7	TRMT1L	protein_coding	0.000402202	1.16185
ENSG00000073756.7	PTGS2	protein_coding	0.000460322	1.37411
ENSG00000227417.3	RP11-397P13.6	pseudogene	0.0154919	-1.5471
ENSG00000236779.1	RP11-430C7.2	pseudogene	0.00710459	-1.5594
ENSG00000236942.1	RP11-6B6.3	pseudogene	0.0148548	-1.89609
ENSG00000162889.6	MAPKAPK2	protein_coding	0.0022288	-1.19596
ENSG00000224114.1	RP11-343H5.4	pseudogene	0.0327078	-1.5313
ENSG00000180667.6	YOD1	protein_coding	0.00566095	1.07711
ENSG00000123689.5	G0S2	protein_coding	0.0124485	-1.5436
ENSG00000162813.13	BPNT1	protein_coding	0.00547032	1.14584
ENSG00000218283.2	MORF4L1P1	pseudogene	0.0409615	-1.18439
ENSG00000203691.2	AC092811.1	protein_coding	0.0483765	-1.03074
ENSG00000173409.9	ARV1	protein_coding	0.0118397	1.04618
ENSG00000236863.2	RPL23AP23	pseudogene	0.0135812	-1.30063
ENSG00000171163.11	ZNF692	protein_coding	0.0341889	1.00373
ENSG00000223522.1	AC093690.1	antisense	0.0442537	-1.47055
ENSG00000091106.14	NLRC4	protein_coding	4.58999e-05	1.9244
ENSG00000230046.1	BIRC6-AS1	antisense	0.00438626	-1.21005
ENSG00000163171.6	CDC42EP3	protein_coding	0.00527766	-1.128
ENSG00000143891.12	GALM	protein_coding	0.0264687	1.28306
ENSG00000250116.2	RP11-417F21.1	antisense	0.00159568	-1.7215
ENSG00000085760.10	MTIF2	protein_coding	0.0238179	1.04446
ENSG00000138035.10	PNPT1	protein_coding	0.0370376	1.16829
ENSG00000115421.8	PAPOLG	protein_coding	0.00537507	1.19787
ENSG00000267520.2	RP11-373L24.1	3prime_overlapping_ncrna	0.0165358	-1.2261
ENSG00000234624.2	AC016894.1	pseudogene	0.00715345	-2.30781
ENSG00000228079.1	AC012368.1	lincRNA	0.027406	1.23601
ENSG00000179833.4	SERTAD2	protein_coding	0.0131893	-1.43954
ENSG00000169564.5	PCBP1	protein_coding	0.0201631	-1.04759
ENSG00000235499.1	AC073046.25	lincRNA	0.00176501	-1.37839
ENSG00000255989.1	RP11-711M9.1	lincRNA	0.00337494	-1.26965
ENSG00000132313.10	MRPL35	protein_coding	0.00869428	1.45959
ENSG00000172086.7	KRCC1	protein_coding	6.40829e-05	1.68157
ENSG00000158050.4	DUSP2	protein_coding	0.000402369	-2.39191
ENSG00000158411.6	MITD1	protein_coding	0.0034633	1.00357
ENSG00000144218.14	AFF3	protein_coding	0.0425829	-1.08887
ENSG00000235066.4	AC009303.1	antisense	0.000126204	-1.81083
ENSG00000273185.1	RP11-98C1.1	antisense	0.012714	-1.14486
ENSG00000272895.1	RP11-98C1.2	antisense	0.00497607	-1.77065
ENSG00000019169.9	MARCO	protein_coding	0.00320737	1.48315
ENSG00000163166.9	IWS1	protein_coding	0.000376182	1.00392
ENSG00000241772.2	AC092620.2	3prime_overlapping_ncrna	0.00481983	-1.1109
ENSG00000237772.1	AC092620.3	lincRNA	0.0269972	-1.23096
ENSG00000257284.1	RP11-190J23.1	antisense	0.0036314	-1.00798
ENSG00000258268.1	RP11-570L15.1	antisense	0.0105634	-1.30609
ENSG00000231758.2	AC092652.1	antisense	0.00298907	-1.24146
ENSG00000238057.4	ZEB2-AS1	antisense	0.0418117	-1.24128
ENSG00000115145.5	STAM2	protein_coding	3.85303e-05	1.0471
ENSG00000234272.1	RPL30P2	pseudogene	0.0264707	1.14305
ENSG00000157827.15	FMNL2	protein_coding	0.00155943	1.12422
ENSG00000153234.9	NR4A2	protein_coding	0.00890941	-1.66956
ENSG00000136541.10	ERMN	protein_coding	0.00409593	-1.25023
ENSG00000230562.3	FAM133DP	pseudogene	0.00743174	-1.69695
ENSG00000270893.1	RP11-311B14.1	pseudogene	0.0230633	1.2035
ENSG00000224467.1	AC009313.1	antisense	0.0242421	-2.46665
ENSG00000115339.9	GALNT3	protein_coding	0.00596501	1.23748
ENSG00000073737.12	DHRS9	protein_coding	0.0171596	1.78231
ENSG00000222043.2	AC079305.10	antisense	0.0300057	-1.05845
ENSG00000270277.1	RP11-65L3.2	antisense	6.55956e-06	1.31247
ENSG00000224323.2	DPRXP1	pseudogene	0.00240138	-1.80992
ENSG00000115896.11	PLCL1	protein_coding	0.0226136	-1.01949
ENSG00000260006.1	RP11-469M7.1	lincRNA	0.000450119	-1.62699
ENSG00000226658.1	AC005037.4	pseudogene	0.0170934	-1.67978
ENSG00000240761.1	AC098831.4	pseudogene	0.0193165	-2.0319
ENSG00000138413.9	IDH1	protein_coding	0.00042869	1.31325
ENSG00000079263.14	SP140	protein_coding	0.00947701	1.03362
ENSG00000135914.5	HTR2B	protein_coding	0.00608963	-1.47223
ENSG00000156966.6	B3GNT7	protein_coding	0.00707618	-2.35835
ENSG00000269363.1	MGC4771	protein_coding	0.0124391	-1.74781
ENSG00000243637.1	AC019221.4	processed_transcript	0.0394851	-1.02264
ENSG00000235947.1	EGOT	lincRNA	0.006455	-1.84234
ENSG00000144711.9	IQSEC1	protein_coding	0.0390964	-1.08452
ENSG00000163528.8	CHCHD4	protein_coding	0.012958	1.16413
ENSG00000224080.1	UBE2FP1	pseudogene	3.04904e-06	-1.97919
ENSG00000176354.2	AC097359.1	pseudogene	0.000120745	-1.77591
ENSG00000144655.10	CSRNP1	protein_coding	0.00092745	-1.01966
ENSG00000168329.9	CX3CR1	protein_coding	0.00105416	1.88031
ENSG00000229339.1	RP11-193I22.2	pseudogene	0.0123765	-2.05044
ENSG00000186448.10	ZNF197	protein_coding	0.00580351	1.29295
ENSG00000163823.3	CCR1	protein_coding	0.0451934	1.0025
ENSG00000121807.5	CCR2	protein_coding	0.000370089	1.47117
ENSG00000160791.12	CCR5	protein_coding	0.0239794	1.79601
ENSG00000012223.8	LTF	protein_coding	0.0189584	-1.20703
ENSG00000239576.1	RP13-480C15.1	pseudogene	0.0157322	-1.76863
ENSG00000244730.1	RP13-1056D16.2	pseudogene	0.0146158	-1.88994
ENSG00000235016.1	RP11-493K19.3	antisense	0.0069707	-1.27129
ENSG00000213600.2	U73169.1	pseudogene	0.00920278	-1.51075
ENSG00000273356.1	RP11-804H8.6	lincRNA	0.00271846	-1.19113
ENSG00000270692.1	RP11-89F17.5	pseudogene	0.00550242	-1.74904
ENSG00000239801.1	RP11-755B10.2	antisense	0.00263983	-1.79255
ENSG00000272181.1	RP11-245J9.6	antisense	0.0343714	-1.16531
ENSG00000270562.1	RP11-154H23.3	lincRNA	0.00137448	1.22511
ENSG00000064225.8	ST3GAL6	protein_coding	0.00946485	1.02388
ENSG00000144802.7	NFKBIZ	protein_coding	0.00607956	-1.75435
ENSG00000186265.5	BTLA	protein_coding	0.0420267	1.19541
ENSG00000239280.1	RP11-271C24.3	pseudogene	0.000293157	-2.12339
ENSG00000242829.1	RPS26P21	pseudogene	0.00614085	-1.59702
ENSG00000153767.5	GTF2E1	protein_coding	5.40881e-05	2.07239
ENSG00000270901.1	RP11-592P9.1	pseudogene	0.00699018	-2.24706
ENSG00000173193.9	PARP14	protein_coding	0.0213478	1.31836
ENSG00000273033.1	RP11-67L2.2	lincRNA	0.00581507	-1.23146
ENSG00000243508.1	RP11-775J23.2	pseudogene	0.0120039	-1.46083
ENSG00000239503.1	MARK2P8	pseudogene	0.00238157	-1.9462
ENSG00000273174.1	RP11-434H6.6	antisense	0.00174234	-2.3055
ENSG00000231845.3	HMGB3P14	pseudogene	0.000606346	-1.78195
ENSG00000174611.7	KY	protein_coding	0.00674714	-1.49797
ENSG00000241429.1	EEF1A1P25	pseudogene	0.00213557	-2.5131
ENSG00000184432.5	COPB2	protein_coding	9.77737e-05	1.3058
ENSG00000248773.1	RP11-231L11.3	sense_intronic	0.0372917	-1.60625
ENSG00000174946.5	GPR171	protein_coding	0.00782817	1.375
ENSG00000163661.3	PTX3	protein_coding	4.73368e-05	-1.69707
ENSG00000267979.1	AC092964.2	protein_coding	0.0192972	-1.12425
ENSG00000121858.6	TNFSF10	protein_coding	0.00833571	2.27121
ENSG00000242539.2	AC007620.3	antisense	0.019283	1.30105
ENSG00000136518.12	ACTL6A	protein_coding	0.026189	1.0202
ENSG00000270554.1	RP11-225N10.3	pseudogene	0.00344658	-1.48336
ENSG00000136514.2	RTP4	protein_coding	0.0235206	3.1196
ENSG00000224855.1	OPA1-AS1	antisense	0.000189919	-2.21637
ENSG00000271483.1	RP11-384A12.1	pseudogene	0.011801	-1.81027
ENSG00000174007.7	CEP19	protein_coding	0.0105966	1.34157
ENSG00000230732.3	AC127904.2	sense_intronic	0.0495711	-1.34764
ENSG00000214846.4	RP11-115L11.1	pseudogene	0.00407492	1.46878
ENSG00000249234.1	RP11-452J21.2	antisense	0.00499666	-1.34946
ENSG00000248283.2	RP11-473D24.1	pseudogene	0.019385	-1.97207
ENSG00000090989.13	EXOC1	protein_coding	0.000352429	1.05665
ENSG00000157426.9	AASDH	protein_coding	0.0273372	1.02745
ENSG00000169429.6	IL8	protein_coding	0.0248366	-1.52199
ENSG00000109321.6	AREG	protein_coding	0.0269493	-1.77331
ENSG00000205595.3	AREGB	protein_coding	0.0306445	-1.75033
ENSG00000169245.4	CXCL10	protein_coding	0.0434665	3.74556
ENSG00000163644.10	PPM1K	protein_coding	0.000822982	1.02724
ENSG00000138642.10	HERC6	protein_coding	0.0308284	1.35059
ENSG00000145335.11	SNCA	protein_coding	0.000766214	1.20582
ENSG00000224207.2	RP11-10L12.1	pseudogene	0.00039973	-1.3314
ENSG00000251288.2	RP11-10L12.2	pseudogene	2.613e-05	-1.78095
ENSG00000145354.5	CISD2	protein_coding	0.021429	1.20827
ENSG00000164040.12	PGRMC2	protein_coding	0.0128805	-1.12984
ENSG00000248810.1	RP11-362F19.1	lincRNA	0.00025156	1.76038
ENSG00000270681.1	RP11-372K14.2	antisense	0.000244099	-3.04952
ENSG00000270751.1	RP11-461L13.2	antisense	0.00146333	-1.33793
ENSG00000248571.1	RP11-768B22.2	antisense	0.022354	-1.10787
ENSG00000164144.10	ARFIP1	protein_coding	0.000470575	1.36766
ENSG00000260244.1	RP11-588K22.2	sense_overlapping	0.0241054	1.11079
ENSG00000145416.9	2019-03-01	protein_coding	0.0210157	1.11375
ENSG00000229894.2	GK3P	pseudogene	0.0420174	-1.12312
ENSG00000137628.12	DDX60	protein_coding	0.0262784	2.11901
ENSG00000164105.3	SAP30	protein_coding	0.00112727	1.30824
ENSG00000168310.6	IRF2	protein_coding	0.00674702	1.24666
ENSG00000249138.1	RP11-701P16.1	pseudogene	0.0130627	-2.06642
ENSG00000251139.1	RP11-701P16.2	protein_coding	0.0276333	-1.80388
ENSG00000145604.11	SKP2	protein_coding	0.0181786	1.05868
ENSG00000249089.1	AIG1P1	pseudogene	0.0149792	-1.2048
ENSG00000113448.12	PDE4D	protein_coding	0.0147962	-1.11853
ENSG00000253251.2	CTC-534A2.2	protein_coding	0.000995086	-1.14175
ENSG00000153914.11	SREK1	protein_coding	0.0156261	-1.01414
ENSG00000253744.1	AC025442.3	antisense	0.0227839	-1.14458
ENSG00000134061.4	CD180	protein_coding	0.0418443	1.04468
ENSG00000242602.1	CTD-2339M3.1	pseudogene	0.0012003	-1.27293
ENSG00000171617.9	ENC1	protein_coding	0.00110135	-1.68264
ENSG00000152359.10	POC5	protein_coding	0.0167692	1.17036
ENSG00000113532.8	ST8SIA4	protein_coding	0.000415164	1.25938
ENSG00000145723.12	GIN1	protein_coding	0.000950889	1.1971
ENSG00000260686.1	CTB-36H16.2	sense_overlapping	0.00125482	1.57752
ENSG00000113368.7	LMNB1	protein_coding	0.0313547	1.3494
ENSG00000234290.2	AC116366.6	antisense	0.0111344	-1.79486
ENSG00000235253.1	AC010240.2	pseudogene	0.0232613	-1.78072
ENSG00000112983.13	BRD8	protein_coding	0.00261905	1.06559
ENSG00000120705.8	ETF1	protein_coding	0.00040829	-1.01293
ENSG00000243056.1	EIF4EBP3	protein_coding	0.00445682	-1.13783
ENSG00000145868.12	FBXO38	protein_coding	0.00124716	1.06359
ENSG00000169252.4	ADRB2	protein_coding	0.0485166	1.12443
ENSG00000241112.1	RPL29P14	pseudogene	0.01404	-1.01762
ENSG00000241907.1	RPS20P4	pseudogene	0.00981231	-2.05859
ENSG00000070814.13	TCOF1	protein_coding	0.0381385	-1.33225
ENSG00000082516.8	GEMIN5	protein_coding	0.0435162	1.0502
ENSG00000120129.5	DUSP1	protein_coding	0.000221127	1.27134
ENSG00000254328.1	CTC-308K20.4	pseudogene	0.00210891	-1.51268
ENSG00000253439.1	CDC42P5	pseudogene	0.0125566	-1.07774
ENSG00000113734.13	BNIP1	protein_coding	0.00800776	-1.10429
ENSG00000169220.13	RGS14	protein_coding	0.000149367	1.10745
ENSG00000248996.1	RP11-1334A24.6	antisense	0.019562	-1.39632
ENSG00000146094.9	DOK3	protein_coding	0.0311252	-1.09001
ENSG00000196670.9	ZFP62	protein_coding	0.0459402	1.07175
ENSG00000078401.6	EDN1	protein_coding	0.0254058	-2.27845
ENSG00000112137.12	PHACTR1	protein_coding	0.0014803	-1.75228
ENSG00000215022.3	RP1-257A7.4	antisense	0.00061482	-1.53129
ENSG00000272379.1	RP1-257A7.5	lincRNA	0.00260889	-2.02305
ENSG00000180537.8	RNF182	protein_coding	0.00013096	2.95737
ENSG00000112149.5	CD83	protein_coding	0.00507725	-1.65245
ENSG00000260286.1	RP3-369A17.5	protein_coding	0.00682212	1.69729
ENSG00000111801.11	BTN3A3	protein_coding	0.00359561	1.06787
ENSG00000181315.6	ZNF322	protein_coding	0.000487886	1.71727
ENSG00000187626.7	ZKSCAN4	protein_coding	0.00161518	1.44454
ENSG00000204713.6	TRIM27	protein_coding	0.00593252	1.23418
ENSG00000204520.8	MICA	protein_coding	0.00794406	1.37834
ENSG00000240065.3	PSMB9	protein_coding	0.00515519	1.25405
ENSG00000168394.9	TAP1	protein_coding	0.0309805	1.14431
ENSG00000204209.6	DAXX	protein_coding	0.00456052	1.06528
ENSG00000237719.1	RP1-179N16.3	pseudogene	0.0173827	-1.39602
ENSG00000096070.15	BRPF3	protein_coding	0.0454022	-1.07337
ENSG00000218521.1	RP11-420A21.1	pseudogene	0.0459769	-1.01991
ENSG00000231102.1	RP11-298J23.5	antisense	0.0106195	-1.37195
ENSG00000170734.7	POLH	protein_coding	0.0276914	1.09344
ENSG00000146232.10	NFKBIE	protein_coding	0.000407689	-1.59702
ENSG00000031691.6	CENPQ	protein_coding	0.00422954	1.29389
ENSG00000096006.7	CRISP3	protein_coding	0.00587987	-1.29778
ENSG00000170915.8	PAQR8	protein_coding	0.00766609	1.5837
ENSG00000217527.1	RPS16P5	pseudogene	0.0128486	-1.77047
ENSG00000236345.1	RP11-59D5__B.2	antisense	0.0229179	1.00655
ENSG00000219881.1	GAPDHP42	pseudogene	0.00558091	-1.67315
ENSG00000236016.3	RP1-3J17.3	antisense	0.0436738	-1.19318
ENSG00000218313.1	RP11-393I2.2	pseudogene	0.00121424	-2.19232
ENSG00000172469.10	MANEA	protein_coding	0.00517039	1.1896
ENSG00000228976.1	SUMO2P8	pseudogene	0.022027	-1.17643
ENSG00000197498.8	RPF2	protein_coding	0.0295019	1.20713
ENSG00000047932.9	GOPC	protein_coding	0.00444183	1.23095
ENSG00000118518.11	RNF146	protein_coding	0.0021665	1.27395
ENSG00000237499.2	RP11-356I2.4	antisense	0.000923066	-1.80331
ENSG00000118503.10	TNFAIP3	protein_coding	0.000148562	-2.77338
ENSG00000217231.2	RP3-340H11.2	pseudogene	0.00397068	-1.85571
ENSG00000237502.2	RP1-12G14.6	antisense	0.0319774	-1.19458
ENSG00000120253.9	NUP43	protein_coding	0.0142704	1.01611
ENSG00000232891.1	RP11-136K14.1	sense_intronic	0.000226966	-5.13524
ENSG00000146476.6	C6orf211	protein_coding	3.2386e-05	1.31067
ENSG00000234361.1	RP11-52J3.3	antisense	0.00349283	-2.46229
ENSG00000236324.1	RP3-403L10.3	antisense	0.000575073	-3.6857
ENSG00000271913.1	RP1-111C20.4	antisense	9.99214e-05	1.78913
ENSG00000164691.12	TAGAP	protein_coding	0.000570808	1.23897
ENSG00000225792.1	AC004540.4	antisense	0.00224818	1.60095
ENSG00000233429.5	HOTAIRM1	antisense	0.00597784	-1.15845
ENSG00000105996.5	HOXA2	protein_coding	0.00801296	-2.20867
ENSG00000229054.1	AC074338.4	pseudogene	0.0487278	1.2119
ENSG00000136197.8	C7orf25	protein_coding	0.0123437	1.0396
ENSG00000235314.1	LINC00957	lincRNA	0.00420764	1.10716
ENSG00000243335.4	KCTD7	protein_coding	0.00334398	-1.08151
ENSG00000271064.1	RP11-792A8.3	pseudogene	0.0387983	-1.15593
ENSG00000235090.1	RPL7L1P3	pseudogene	0.0111011	-1.66005
ENSG00000187257.10	RSBN1L	protein_coding	0.000174559	1.06282
ENSG00000135211.5	TMEM60	protein_coding	0.000185971	1.53215
ENSG00000254003.1	CTB-167B5.1	antisense	0.0411761	-1.0445
ENSG00000205413.3	SAMD9	protein_coding	0.015701	1.43134
ENSG00000177409.7	SAMD9L	protein_coding	0.00487665	2.43465
ENSG00000004799.7	PDK4	protein_coding	0.00388724	1.33897
ENSG00000242687.2	AC004893.11	antisense	0.0329913	-1.03018
ENSG00000160908.14	ZNF394	protein_coding	0.00133738	-1.08807
ENSG00000221909.2	FAM200A	protein_coding	0.00048218	1.79017
ENSG00000169871.8	TRIM56	protein_coding	0.0286918	1.38599
ENSG00000272072.1	CTA-363E19.2	antisense	0.00601645	-1.32481
ENSG00000234358.1	AC003080.4	pseudogene	0.0140438	-1.30684
ENSG00000135272.5	MDFIC	protein_coding	0.0122198	1.30135
ENSG00000105967.11	TFEC	protein_coding	0.041411	1.62978
ENSG00000235945.1	AC002543.2	pseudogene	0.0143163	-1.08946
ENSG00000244556.1	ODCP	pseudogene	0.00259892	-1.46362
ENSG00000235967.1	COX5BP3	pseudogene	0.0438062	-1.41017
ENSG00000226205.1	AC007790.4	pseudogene	0.0477216	-1.21283
ENSG00000172331.7	BPGM	protein_coding	0.000517085	1.2214
ENSG00000221937.3	TAS2R40	protein_coding	0.0086685	1.30373
ENSG00000171115.3	GIMAP8	protein_coding	2.73396e-07	3.2131
ENSG00000179144.4	GIMAP7	protein_coding	0.000241337	1.81539
ENSG00000133574.5	GIMAP4	protein_coding	1.91247e-05	2.22886
ENSG00000133561.11	GIMAP6	protein_coding	0.00137668	1.34164
ENSG00000106560.6	GIMAP2	protein_coding	4.59305e-06	1.46332
ENSG00000213203.2	GIMAP1	protein_coding	0.00224193	1.42542
ENSG00000196329.6	GIMAP5	protein_coding	0.0285469	1.08773
ENSG00000240132.1	ETF1P2	pseudogene	0.0241119	-1.49482
ENSG00000241007.1	SEPT7P6	pseudogene	0.0218464	-1.171
ENSG00000214106.3	PAXIP1-AS2	protein_coding	0.00529574	1.07396
ENSG00000272760.1	RP11-5C23.1	antisense	0.00764025	1.14559
ENSG00000173281.4	PPP1R3B	protein_coding	0.00563502	1.1722
ENSG00000038945.10	MSR1	protein_coding	0.0200162	1.84752
ENSG00000171428.9	NAT1	protein_coding	0.00646728	1.24692
ENSG00000253200.1	RP11-582J16.5	antisense	0.0116741	-1.56623
ENSG00000173530.5	TNFRSF10D	protein_coding	0.000111637	-1.1027
ENSG00000104765.10	BNIP3L	protein_coding	0.00986879	1.05069
ENSG00000259366.1	CTD-2647L4.4	sense_intronic	0.0450598	-1.00549
ENSG00000272256.1	RP11-489E7.4	antisense	0.00456617	-1.25056
ENSG00000271869.1	RP11-51J9.5	lincRNA	0.00866924	-1.05084
ENSG00000253829.1	RP11-723D22.3	antisense	0.00298163	-1.3733
ENSG00000221869.4	CEBPD	protein_coding	0.00926615	1.02212
ENSG00000253475.1	RP11-110G21.2	sense_intronic	0.0275072	-1.88704
ENSG00000255321.1	RP11-91I20.4	antisense	0.0279264	-1.75378
ENSG00000272254.1	RP11-531A24.7	antisense	0.0486837	-1.30659
ENSG00000104343.15	UBE2W	protein_coding	0.00336262	1.0975
ENSG00000205189.7	ZBTB10	protein_coding	0.0118541	-1.25998
ENSG00000254060.1	RP11-172E10.1	lincRNA	0.0265038	-1.03113
ENSG00000260368.1	RP11-521I2.3	sense_overlapping	0.00880114	1.30349
ENSG00000155090.10	KLF10	protein_coding	0.00420999	-1.50905
ENSG00000253385.1	KB-1254G8.1	lincRNA	0.0118226	-2.02172
ENSG00000120526.6	NUDCD1	protein_coding	0.0129776	1.15951
ENSG00000253372.1	RP11-44N11.1	sense_intronic	0.0155775	-1.72827
ENSG00000253607.1	RP11-557C18.3	antisense	0.0269727	-1.4471
ENSG00000253167.1	KIAA0196-AS1	antisense	0.0267668	-1.01657
ENSG00000253720.1	RP11-473O4.3	lincRNA	0.0211921	-1.66832
ENSG00000253307.1	RP11-10J21.4	antisense	0.0119167	-1.7768
ENSG00000254019.1	RP11-10J21.3	protein_coding	0.000622158	-2.13085
ENSG00000254197.1	RP11-10J21.5	lincRNA	0.00750539	-1.84975
ENSG00000178685.9	PARP10	protein_coding	0.0263596	1.29388
ENSG00000182347.10	RP11-39K24.9	pseudogene	0.0147488	1.489
ENSG00000215066.3	C9orf38	protein_coding	0.0408525	-1.01722
ENSG00000122729.14	ACO1	protein_coding	0.0256918	1.95811
ENSG00000107201.5	DDX58	protein_coding	0.00844645	2.28672
ENSG00000232303.2	RP11-205M20.7	pseudogene	0.00218132	-1.73535
ENSG00000086065.9	CHMP5	protein_coding	0.0063703	1.76282
ENSG00000235481.2	RP11-133O22.6	antisense	0.0402359	-1.06661
ENSG00000203511.3	AL353662.1	pseudogene	0.0151219	-1.7128
ENSG00000233668.1	RP11-571F15.3	pseudogene	0.00936379	-2.29391
ENSG00000164967.5	RPP25L	protein_coding	0.00553567	1.13522
ENSG00000196092.8	PAX5	protein_coding	0.0247155	-1.22948
ENSG00000225529.2	BX088645.3	pseudogene	0.041683	-1.12735
ENSG00000238113.2	RP11-262H14.1	lincRNA	0.0175868	1.15647
ENSG00000181778.4	TMEM252	protein_coding	0.013791	4.21806
ENSG00000234506.1	RP11-274B18.2	lincRNA	0.0276202	1.1117
ENSG00000165118.10	C9orf64	protein_coding	0.00116811	1.5376
ENSG00000178966.11	RMI1	protein_coding	0.0181614	1.33247
ENSG00000135047.10	CTSL	protein_coding	0.0219083	1.40488
ENSG00000123975.4	CKS2	protein_coding	0.0107484	1.15767
ENSG00000131669.5	NINJ1	protein_coding	0.000291871	-1.10413
ENSG00000196116.6	TDRD7	protein_coding	0.00834884	1.60844
ENSG00000228366.1	RP11-18B3.3	pseudogene	0.00469778	-2.31223
ENSG00000198121.9	LPAR1	protein_coding	0.0437745	1.31582
ENSG00000165181.12	C9orf84	protein_coding	0.00584188	1.67203
ENSG00000235865.2	GSN-AS1	antisense	0.0408507	-1.35708
ENSG00000119421.5	NDUFA8	protein_coding	0.0050763	1.19959
ENSG00000232630.1	PRPS1P2	pseudogene	0.0259612	-1.0769
ENSG00000119392.10	GLE1	protein_coding	0.000379116	1.09816
ENSG00000136816.11	TOR1B	protein_coding	0.0293675	1.16874
ENSG00000246851.1	RP11-544A12.8	antisense	0.0078513	-1.68387
ENSG00000170525.14	PFKFB3	protein_coding	0.0189359	-1.31198
ENSG00000269897.1	COMMD3-BMI1	protein_coding	0.00517137	2.29825
ENSG00000196960.3	RP11-192P3.5	antisense	0.0192351	-1.0546
ENSG00000107551.16	RASSF4	protein_coding	0.0070195	1.08865
ENSG00000122873.7	CISD1	protein_coding	0.0120427	1.06877
ENSG00000122877.9	EGR2	protein_coding	0.00162896	2.33728
ENSG00000229097.1	CALM2P2	pseudogene	0.0207748	-1.27182
ENSG00000250959.2	GLUD1P3	pseudogene	0.032424	-1.22608
ENSG00000272916.1	RP11-574K11.31	protein_coding	0.0299493	-1.2622
ENSG00000122861.11	PLAU	protein_coding	0.00469974	-3.14835
ENSG00000108175.12	ZMIZ1	protein_coding	0.0131134	-1.0526
ENSG00000108179.9	PPIF	protein_coding	0.000422403	-1.35003
ENSG00000261438.1	RP11-399O19.9	sense_overlapping	0.00480874	1.31858
ENSG00000119922.7	IFIT2	protein_coding	0.0353177	2.87311
ENSG00000235677.1	NPM1P26	pseudogene	0.0109676	-1.30989
ENSG00000155640.5	C10orf12	protein_coding	0.0264725	-1.10207
ENSG00000155252.12	PI4K2A	protein_coding	0.00157822	-1.328
ENSG00000119986.6	AVPI1	protein_coding	0.00766665	-2.04588
ENSG00000107554.11	DNMBP	protein_coding	0.0187199	-1.11457
ENSG00000230224.1	PHBP9	pseudogene	0.0395351	-1.04818
ENSG00000214067.2	RP11-549L6.2	pseudogene	0.0258165	-1.53854
ENSG00000234118.1	RPL13AP6	pseudogene	0.00173957	-1.7067
ENSG00000148737.11	TCF7L2	protein_coding	0.0281731	-1.30118
ENSG00000227560.1	RP11-139K1.2	pseudogene	0.00501958	-1.73019
ENSG00000228485.1	RP11-567J24.4	sense_intronic	0.00418092	-1.60735
ENSG00000095574.7	IKZF5	protein_coding	0.00623969	-1.09666
ENSG00000226899.1	RP11-298J20.3	antisense	0.0386154	-1.28014
ENSG00000270030.1	RP11-326C3.13	lincRNA	0.0461878	2.1957
ENSG00000235027.1	AC068580.6	antisense	0.000717106	-1.57469
ENSG00000229512.1	AC068580.5	sense_intronic	0.00325488	-1.62274
ENSG00000230593.2	AC090804.1	pseudogene	0.0470957	-1.39029
ENSG00000132109.8	TRIM21	protein_coding	0.000854305	1.8449
ENSG00000258588.2	TRIM6-TRIM34	protein_coding	0.000148625	1.49801
ENSG00000132256.14	TRIM5	protein_coding	0.00742414	1.56263
ENSG00000132274.11	TRIM22	protein_coding	0.0228229	1.50299
ENSG00000254595.1	CTD-2010I16.1	pseudogene	0.0139976	-1.8391
ENSG00000254838.4	GVINP1	pseudogene	0.00294254	1.19839
ENSG00000255097.1	RP11-5L12.1	sense_intronic	0.0131681	-2.4865
ENSG00000254884.1	RP11-682B13.2	pseudogene	0.00466433	-1.53286
ENSG00000254719.1	RP11-351I24.3	pseudogene	0.0185077	-1.01127
ENSG00000255492.1	CTD-2381F24.1	pseudogene	0.00291507	-2.06737
ENSG00000240454.1	RPL39P26	pseudogene	4.58439e-05	-2.59433
ENSG00000256464.1	RP11-613F22.5	pseudogene	0.0421678	-1.04289
ENSG00000256588.1	RP11-613F22.8	sense_intronic	0.00303905	-2.21218
ENSG00000177054.9	ZDHHC13	protein_coding	4.76522e-05	1.19374
ENSG00000271332.1	RP11-797J4.1	pseudogene	0.0374349	1.20205
ENSG00000135363.7	LMO2	protein_coding	0.00644127	1.0926
ENSG00000261355.1	RP11-698N11.4	sense_overlapping	0.0342142	-1.25904
ENSG00000254693.1	RP11-58K22.5	antisense	0.00223992	-3.82056
ENSG00000255092.1	RP11-58K22.4	antisense	0.00998809	-2.93868
ENSG00000244267.1	RPL34P22	pseudogene	0.0337434	-1.44175
ENSG00000213592.4	AP000662.9	pseudogene	0.0139431	-1.67838
ENSG00000242689.1	CNTF	protein_coding	0.00407633	-1.41268
ENSG00000189057.6	FAM111B	protein_coding	0.0359625	-1.0877
ENSG00000166801.11	FAM111A	protein_coding	0.0256288	1.35441
ENSG00000110077.10	MS4A6A	protein_coding	0.00450363	1.06736
ENSG00000166927.8	MS4A7	protein_coding	0.00255487	1.16648
ENSG00000110446.5	SLC15A3	protein_coding	0.00503864	-1.0156
ENSG00000168066.16	SF1	protein_coding	0.0203901	-1.29316
ENSG00000110046.8	ATG2A	protein_coding	0.000183757	-1.85642
ENSG00000173338.8	KCNK7	protein_coding	0.00529976	-1.42392
ENSG00000255320.1	RP11-755F10.1	antisense	0.0322335	-1.70405
ENSG00000255329.1	H2AFZP4	pseudogene	0.00209178	-1.62872
ENSG00000254682.1	RP11-660L16.2	antisense	0.0205701	-1.02171
ENSG00000245148.2	ARAP1-AS2	antisense	0.0149198	-1.65543
ENSG00000244134.1	RPS12P20	pseudogene	0.00937231	-2.32106
ENSG00000175538.6	KCNE3	protein_coding	6.85643e-06	2.06331
ENSG00000254826.1	CTD-2530H12.2	sense_intronic	0.0138826	-2.21005
ENSG00000255421.1	CTD-2011F17.2	antisense	0.0100698	-2.24234
ENSG00000188997.3	KCTD21	protein_coding	0.000852925	1.58702
ENSG00000196371.2	FUT4	protein_coding	0.0181141	-1.13043
ENSG00000183340.5	JRKL	protein_coding	0.00190103	1.54453
ENSG00000196954.8	CASP4	protein_coding	0.0236906	1.12887
ENSG00000137752.18	CASP1	protein_coding	0.00433222	1.09388
ENSG00000204397.3	CARD16	protein_coding	0.0353492	1.17958
ENSG00000170903.6	MSANTD4	protein_coding	0.0274678	1.02828
ENSG00000243250.1	RPS6P16	pseudogene	0.0412242	-1.10384
ENSG00000180425.7	C11orf71	protein_coding	0.00914612	1.07174
ENSG00000231865.1	SIK3-IT1	sense_intronic	0.0138033	-1.70768
ENSG00000240970.1	RPL23AP64	pseudogene	0.0224054	-1.13341
ENSG00000151702.12	FLI1	protein_coding	0.00202753	1.05163
ENSG00000244451.1	RPL34P21	pseudogene	0.002415	-2.82208
ENSG00000255220.1	DDX18P5	pseudogene	0.00944236	-1.51795
ENSG00000261799.1	RP11-283I3.6	sense_overlapping	0.0150069	1.11207
ENSG00000271500.1	RP11-288K12.1	pseudogene	0.0115061	-1.19228
ENSG00000196138.3	AC005831.1	pseudogene	0.0251661	-1.72928
ENSG00000247853.2	RP5-940J5.6	antisense	0.00396617	-1.63118
ENSG00000171860.4	C3AR1	protein_coding	0.00238514	1.62609
ENSG00000272917.1	RP11-705C15.5	processed_transcript	0.00304758	-2.49089
ENSG00000110848.4	CD69	protein_coding	0.0147335	-1.20194
ENSG00000258546.1	RP11-713N11.3	pseudogene	0.0114881	-1.01935
ENSG00000255968.1	RP11-513G19.1	antisense	0.00157152	-1.59282
ENSG00000247903.1	RP11-421F16.3	antisense	0.0239657	1.2253
ENSG00000151743.6	AMN1	protein_coding	0.0114499	1.03215
ENSG00000257094.1	RP11-50I19.1	pseudogene	0.00843013	1.86143
ENSG00000229899.1	AC084290.2	pseudogene	0.0191308	1.16952
ENSG00000186666.4	BCDIN3D	protein_coding	0.021803	1.35219
ENSG00000272368.1	RP4-605O3.4	processed_transcript	0.00128129	-1.38509
ENSG00000161835.6	GRASP	protein_coding	0.000709052	-2.49781
ENSG00000167768.4	KRT1	protein_coding	0.0412611	1.15728
ENSG00000197111.11	PCBP2	protein_coding	0.00817721	-1.07956
ENSG00000161642.13	ZNF385A	protein_coding	0.00859924	-1.15512
ENSG00000170581.9	STAT2	protein_coding	0.0493516	1.20569
ENSG00000166886.8	NAB2	protein_coding	0.0045596	-1.28433
ENSG00000135407.6	AVIL	protein_coding	0.0035021	1.35814
ENSG00000257953.1	RP11-620J15.1	antisense	0.0194816	-1.71269
ENSG00000225195.2	RP11-338E21.2	sense_intronic	0.0217735	-1.53272
ENSG00000256314.1	RP11-338E21.3	antisense	0.00525895	-1.39306
ENSG00000234040.3	RP11-254B13.4	pseudogene	0.0170284	-1.46757
ENSG00000234925.2	RP11-254B13.3	pseudogene	0.0112195	-1.35614
ENSG00000257802.1	MRS2P2	pseudogene	5.61327e-05	-2.74313
ENSG00000179941.6	BBS10	protein_coding	0.000637071	1.89091
ENSG00000258215.1	RP11-299A16.1	pseudogene	0.0228095	1.11195
ENSG00000139324.7	TMTC3	protein_coding	0.0191754	1.07239
ENSG00000257242.2	C12orf79	protein_coding	0.000229171	-2.08814
ENSG00000173598.9	NUDT4	protein_coding	0.00653163	1.22138
ENSG00000255150.1	EID3	protein_coding	0.000279704	-1.83479
ENSG00000174600.9	CMKLR1	protein_coding	0.0158882	1.21335
ENSG00000135148.7	TRAFD1	protein_coding	0.00432294	1.22495
ENSG00000258034.1	RP11-493P1.2	antisense	0.00291585	-1.12028
ENSG00000196668.3	LINC00173	processed_transcript	0.0431894	-1.15375
ENSG00000255933.1	RP11-495K9.5	lincRNA	0.0145903	-2.03104
ENSG00000226352.2	RP11-523H24.3	antisense	0.0213673	1.47245
ENSG00000230022.1	FNTAP2	pseudogene	0.0339586	-1.52489
ENSG00000152484.9	USP12	protein_coding	0.00394587	1.09251
ENSG00000232162.1	USP12-AS1	antisense	0.0177381	-1.45435
ENSG00000232587.1	EEF1A1P3	pseudogene	0.00435467	-1.16212
ENSG00000102738.6	MRPS31	protein_coding	0.00179049	1.51724
ENSG00000229473.2	RGS17P1	pseudogene	0.000944293	-1.58477
ENSG00000120696.8	KBTBD7	protein_coding	0.000197396	1.71435
ENSG00000179630.6	LACC1	protein_coding	0.0115745	1.36082
ENSG00000180332.5	KCTD4	protein_coding	0.0237744	-1.11566
ENSG00000229111.1	MED4-AS1	antisense	0.010506	-1.78688
ENSG00000136147.12	PHF11	protein_coding	0.00444756	1.28826
ENSG00000204977.5	TRIM13	protein_coding	8.34855e-06	1.34591
ENSG00000198553.4	KCNRG	protein_coding	0.000138715	2.458
ENSG00000269965.1	RP11-24B19.4	sense_intronic	2.61364e-05	3.04151
ENSG00000253797.2	UTP14C	protein_coding	0.000940895	1.37365
ENSG00000152193.7	RNF219	protein_coding	0.0157648	1.15742
ENSG00000232373.2	MTCYBP3	pseudogene	0.0229552	-2.26059
ENSG00000218502.3	H2AFZP3	pseudogene	0.0394584	-1.56591
ENSG00000185950.7	IRS2	protein_coding	0.00214511	-1.29577
ENSG00000179933.4	C14orf119	protein_coding	5.90174e-05	1.51959
ENSG00000100918.8	REC8	protein_coding	0.0276383	-1.45772
ENSG00000196497.11	IPO4	protein_coding	0.0204594	-1.24372
ENSG00000258648.1	UBE2CP1	pseudogene	0.0486443	-1.22089
ENSG00000165410.10	CFL2	protein_coding	0.00695089	-1.24461
ENSG00000258738.1	RP11-73E17.2	antisense	0.000964763	-1.15636
ENSG00000100906.6	NFKBIA	protein_coding	0.000497148	-2.06082
ENSG00000165355.7	FBXO33	protein_coding	0.00160214	-1.02506
ENSG00000258928.1	RP11-463J10.2	protein_coding	0.000128435	-3.08802
ENSG00000261208.1	RP11-452D12.1	pseudogene	0.0436914	2.11476
ENSG00000178974.5	FBXO34	protein_coding	0.00128042	2.16311
ENSG00000070269.9	TMEM260	protein_coding	0.00677058	1.11091
ENSG00000258667.1	HIF1A-AS2	lincRNA	0.0343284	-1.09447
ENSG00000140006.7	WDR89	protein_coding	0.0382826	1.35064
ENSG00000259116.1	RP11-973N13.4	antisense	0.0318863	-1.17946
ENSG00000259118.1	RP11-840I19.3	antisense	0.00913468	-1.95816
ENSG00000198133.4	TMEM229B	protein_coding	0.00331926	1.51639
ENSG00000259165.1	DDX18P1	pseudogene	0.0303881	-1.11275
ENSG00000258951.1	KRT18P7	pseudogene	0.00607392	-1.381
ENSG00000259079.1	RP1-261D10.1	pseudogene	0.0281948	-1.07345
ENSG00000205659.6	LIN52	protein_coding	0.0163872	1.13713
ENSG00000258769.1	RAP1AP	pseudogene	0.01686	-1.11395
ENSG00000258439.1	RP11-173A8.2	pseudogene	0.0216317	-1.20848
ENSG00000170345.5	FOS	protein_coding	0.00119741	2.30754
ENSG00000119714.6	GPR68	protein_coding	0.0184846	1.19647
ENSG00000100815.8	TRIP11	protein_coding	0.000896025	1.11068
ENSG00000100599.11	RIN3	protein_coding	0.0335961	-1.03366
ENSG00000165943.4	MOAP1	protein_coding	0.0152439	-1.12654
ENSG00000090061.13	CCNK	protein_coding	0.00783981	-1.23545
ENSG00000100811.6	YY1	protein_coding	0.00325106	-1.01319
ENSG00000259013.2	RP11-1017G21.3	pseudogene	0.0156857	-2.07217
ENSG00000230988.3	RP11-661D19.1	pseudogene	0.00515028	-1.57402
ENSG00000259717.1	LINC00677	lincRNA	0.0277873	-1.29
ENSG00000259468.1	RP11-1084A12.2	antisense	0.00653645	-1.81982
ENSG00000175746.4	C15orf54	protein_coding	0.0412154	-1.08693
ENSG00000137806.4	NDUFAF1	protein_coding	0.000365448	1.75893
ENSG00000140259.6	MFAP1	protein_coding	0.00170655	1.48684
ENSG00000185880.8	TRIM69	protein_coding	0.00661082	1.45743
ENSG00000242737.1	RP11-562A8.1	pseudogene	0.0373654	-1.03538
ENSG00000259298.1	RP11-562A8.4	antisense	0.000363143	-1.44206
ENSG00000140280.9	LYSMD2	protein_coding	0.000315347	1.52401
ENSG00000259657.1	PIGHP1	pseudogene	0.00646888	-1.28552
ENSG00000240163.1	RP11-745A24.1	pseudogene	0.016284	-1.23553
ENSG00000259248.1	USP3-AS1	antisense	0.0101164	-1.31983
ENSG00000180304.10	OAZ2	protein_coding	0.00984565	-1.12155
ENSG00000264937.1	AC100830.5	antisense	0.00180445	-2.383
ENSG00000167173.14	C15orf39	protein_coding	0.0110357	-1.46953
ENSG00000269951.1	RP11-797A18.6	sense_intronic	0.00154732	-1.70633
ENSG00000172345.9	STARD5	protein_coding	0.00873543	1.1928
ENSG00000259699.2	HMGB1P8	pseudogene	0.00234997	-2.0398
ENSG00000176463.9	SLCO3A1	protein_coding	0.0192992	-1.13673
ENSG00000260661.1	RP11-152L20.3	antisense	0.0295399	-1.48963
ENSG00000272888.1	AC013394.2	processed_transcript	0.00322859	-1.10747
ENSG00000261505.1	LA16c-358B7.3	antisense	0.0294409	-1.55527
ENSG00000269937.1	RP11-20I23.8	antisense	0.0122692	-1.44413
ENSG00000167978.12	SRRM2	protein_coding	0.0246451	-1.85124
ENSG00000006327.9	TNFRSF12A	protein_coding	0.00047372	-2.21625
ENSG00000010539.7	ZNF200	protein_coding	0.00175564	1.25366
ENSG00000262516.1	RP11-95J11.1	pseudogene	0.025687	-1.25691
ENSG00000168140.4	VASN	protein_coding	0.016492	-1.95689
ENSG00000263244.1	RP11-473I1.10	sense_intronic	0.00184626	-1.1524
ENSG00000261528.2	AC002400.1	pseudogene	0.00620229	-3.028
ENSG00000166847.5	DCTN5	protein_coding	0.0465931	1.07281
ENSG00000260727.1	SLC7A5P1	pseudogene	0.0265389	-1.14286
ENSG00000250616.2	RP11-455F5.3	antisense	0.0371166	1.01252
ENSG00000102886.10	GDPD3	protein_coding	0.00480946	1.21155
ENSG00000099381.12	SETD1A	protein_coding	0.045323	-1.20944
ENSG00000259950.1	RP11-170L3.4	pseudogene	0.000805878	-1.34271
ENSG00000261267.1	RP11-44I10.3	antisense	0.00486528	-1.5904
ENSG00000243609.1	RPS2P44	pseudogene	0.0130094	-2.01763
ENSG00000260033.1	CTC-527H23.1	pseudogene	0.00480274	-1.7133
ENSG00000259922.1	RP11-322D14.1	pseudogene	0.0167704	-1.21247
ENSG00000088682.9	COQ9	protein_coding	0.0163286	1.09652
ENSG00000182885.12	GPR97	protein_coding	0.0104197	-1.2072
ENSG00000260467.1	RP11-405F3.4	antisense	0.00587351	-2.75205
ENSG00000224470.3	ATXN1L	protein_coding	0.00536881	-1.0631
ENSG00000260229.1	RP11-391L3.5	pseudogene	0.0103946	-1.72287
ENSG00000261574.1	RP1-168P16.2	sense_intronic	0.0436303	-1.27889
ENSG00000270832.1	RP1-168P16.3	pseudogene	0.0214968	-1.56205
ENSG00000186594.8	MIR22HG	lincRNA	7.53927e-05	-2.18901
ENSG00000070444.10	MNT	protein_coding	0.0163374	-1.18992
ENSG00000262480.2	SAMD11P1	pseudogene	0.00286529	-1.90261
ENSG00000213876.4	RPL7AP64	pseudogene	0.00834786	1.39624
ENSG00000181284.2	TMEM102	protein_coding	0.0293873	1.07102
ENSG00000179094.9	PER1	protein_coding	0.000553676	-1.92031
ENSG00000220205.4	VAMP2	protein_coding	0.0113322	-1.12879
ENSG00000266538.1	RP11-385D13.3	lincRNA	0.0292012	-1.57923
ENSG00000265205.1	AC010761.13	antisense	0.0251311	-1.42681
ENSG00000263370.1	RP11-68I3.5	antisense	0.0144453	1.29731
ENSG00000108651.5	UTP6	protein_coding	0.00588763	1.09076
ENSG00000267457.1	RP5-837J1.4	lincRNA	0.0136749	-1.50246
ENSG00000166750.5	SLFN5	protein_coding	0.00145944	1.52166
ENSG00000267745.1	RP11-686D22.8	processed_transcript	0.0333893	1.88487
ENSG00000267102.1	RP11-686D22.7	pseudogene	0.000940163	1.50196
ENSG00000172123.8	SLFN12	protein_coding	0.000562591	1.40567
ENSG00000236002.3	CTB-75G16.1	pseudogene	0.0233445	-1.22885
ENSG00000267306.1	RP11-333J10.2	sense_intronic	0.000701643	-2.29511
ENSG00000267798.1	RP11-333J10.3	sense_intronic	0.00176979	-1.88383
ENSG00000261005.1	CTB-58E17.1	lincRNA	0.0213546	-1.0893
ENSG00000263466.1	RP1-56K13.2	antisense	0.0113827	-1.21133
ENSG00000126368.5	NR1D1	protein_coding	0.00913109	-1.68596
ENSG00000267758.1	RP11-358B23.5	antisense	0.0031671	-1.29694
ENSG00000236194.2	AC003104.1	sense_intronic	0.00631077	-1.19678
ENSG00000184988.4	TMEM106A	protein_coding	0.0295472	1.09411
ENSG00000239291.1	RP5-867C24.1	pseudogene	0.0326103	-1.37249
ENSG00000263883.1	RP11-51F16.5	pseudogene	0.0317653	-1.13465
ENSG00000213180.4	RPL36AP48	pseudogene	0.0121379	-1.90829
ENSG00000141219.11	C17orf80	protein_coding	0.0116059	1.08721
ENSG00000264853.1	RP11-16C1.2	sense_intronic	0.0169458	-1.38314
ENSG00000265342.1	RP11-16C1.1	antisense	0.00107634	-2.34391
ENSG00000264270.1	RP11-474I11.7	antisense	0.00215677	-1.95845
ENSG00000268965.1	AC061992.1	protein_coding	0.013087	1.14304
ENSG00000178404.5	DDC8	protein_coding	0.00764874	-2.17943
ENSG00000267491.1	CTD-2373H9.5	antisense	0.0227928	-2.2505
ENSG00000141551.10	CSNK1D	protein_coding	0.0255751	-1.23946
ENSG00000184551.4	AC132872.1	pseudogene	0.0110237	-1.76025
ENSG00000268852.1	AC132872.2	protein_coding	0.00208653	-2.23457
ENSG00000266236.1	NARF-IT1	sense_intronic	0.0116373	-1.70442
ENSG00000263606.1	RP11-737O24.3	pseudogene	0.00751515	1.24368
ENSG00000263847.1	RP11-143J12.3	antisense	0.0151813	-1.52231
ENSG00000265656.1	RP11-13N13.6	antisense	0.0063278	1.82452
ENSG00000134758.9	RNF138	protein_coding	0.0129416	-1.24609
ENSG00000186812.8	ZNF397	protein_coding	0.000273948	1.47639
ENSG00000266965.1	RP11-712P20.2	sense_intronic	0.0194306	-2.04089
ENSG00000141469.12	SLC14A1	protein_coding	0.00454107	1.03226
ENSG00000267293.1	RP11-8H2.1	pseudogene	0.0194781	-1.33305
ENSG00000166401.9	SERPINB8	protein_coding	0.0475874	-1.07583
ENSG00000267655.1	CTD-2286N8.2	sense_intronic	0.00174499	-2.53187
ENSG00000167470.8	MIDN	protein_coding	0.011014	-1.06622
ENSG00000079313.7	REXO1	protein_coding	0.0172251	-1.17856
ENSG00000267244.1	CTB-31O20.4	processed_transcript	0.0128746	-1.87122
ENSG00000261526.1	CTB-31O20.2	lincRNA	0.00101971	-1.61804
ENSG00000267283.1	AC005306.3	antisense	0.00320413	1.5431
ENSG00000205147.3	AC016586.1	protein_coding	0.017004	-1.65218
ENSG00000268670.1	CTD-2622I13.3	sense_intronic	0.0242441	-1.06069
ENSG00000167664.4	TMIGD2	protein_coding	0.0463728	-1.193
ENSG00000127666.8	TICAM1	protein_coding	0.0409262	-1.19089
ENSG00000125735.6	TNFSF14	protein_coding	0.00350921	1.71643
ENSG00000104921.10	FCER2	protein_coding	0.00761237	-1.1755
ENSG00000133250.9	ZNF414	protein_coding	0.039599	-1.07762
ENSG00000090339.4	ICAM1	protein_coding	0.00212918	-1.82688
ENSG00000197044.6	ZNF441	protein_coding	0.00112757	1.39202
ENSG00000072062.9	PRKACA	protein_coding	0.0115239	-1.18877
ENSG00000132002.3	DNAJB1	protein_coding	0.000929596	-1.05318
ENSG00000270143.1	AC004257.3	lincRNA	0.0417478	-1.33613
ENSG00000130303.8	BST2	protein_coding	0.0452186	1.44238
ENSG00000267234.1	CTB-184G21.3	antisense	0.00183045	-2.11134
ENSG00000271598.1	CTD-2542C24.9	pseudogene	0.00454951	-3.02612
ENSG00000240522.1	RPL7AP10	pseudogene	0.0443629	-1.15401
ENSG00000268322.1	CTD-3030D20.2	pseudogene	0.00358448	-1.91319
ENSG00000269845.1	RP11-420K14.6	pseudogene	0.00773857	-2.42504
ENSG00000197841.10	ZNF181	protein_coding	0.0205022	1.38571
ENSG00000167604.9	NFKBID	protein_coding	0.00165681	-1.7778
ENSG00000167635.7	ZNF146	protein_coding	0.0326202	1.00897
ENSG00000128000.11	ZNF780B	protein_coding	0.0234606	1.2771
ENSG00000197782.10	ZNF780A	protein_coding	0.00882375	1.28549
ENSG00000233622.1	CYP2T2P	pseudogene	0.0115749	-1.27569
ENSG00000105369.5	CD79A	protein_coding	0.0352843	-1.12177
ENSG00000079432.3	CIC	protein_coding	0.0422917	-1.08773
ENSG00000167378.4	IRGQ	protein_coding	0.0150874	-1.1029
ENSG00000159882.8	ZNF230	protein_coding	0.000576592	1.40689
ENSG00000159885.9	ZNF222	protein_coding	0.00286621	1.04586
ENSG00000186019.10	AC084219.4	antisense	0.027286	1.04211
ENSG00000263002.3	ZNF234	protein_coding	0.00272426	2.14771
ENSG00000167380.12	ZNF226	protein_coding	0.00561443	1.24517
ENSG00000069399.8	BCL3	protein_coding	0.00695578	-1.61942
ENSG00000268001.1	CTC-241F20.3	antisense	0.00125994	1.55805
ENSG00000254760.1	CTD-2616J11.3	antisense	0.0130877	-1.26602
ENSG00000176024.12	ZNF613	protein_coding	6.36714e-07	2.07969
ENSG00000204611.2	ZNF616	protein_coding	0.00220819	2.0079
ENSG00000167562.7	ZNF701	protein_coding	7.23079e-05	1.34035
ENSG00000123870.9	ZNF137P	pseudogene	0.00378899	1.24797
ENSG00000198538.6	ZNF28	protein_coding	8.68436e-06	1.9035
ENSG00000180257.8	ZNF816	protein_coding	0.00635939	1.57087
ENSG00000269001.1	ZNF818P	pseudogene	0.00301303	1.49901
ENSG00000186431.14	FCAR	protein_coding	0.00907	-1.13108
ENSG00000261221.1	ZNF865	protein_coding	0.0285485	-1.08697
ENSG00000083814.8	ZNF671	protein_coding	0.00402587	1.14526
ENSG00000152454.3	ZNF256	protein_coding	0.00699895	-1.00914
ENSG00000273439.1	ZNF8	protein_coding	0.0139306	-1.18411
ENSG00000101278.6	RPS10L	pseudogene	0.00306682	-2.3241
ENSG00000125780.11	TGM3	protein_coding	0.0237127	-1.21254
ENSG00000125968.7	ID1	protein_coding	0.00129342	-3.17237
ENSG00000126003.6	PLAGL2	protein_coding	0.00524213	-1.52112
ENSG00000229472.1	RP1-64K7.4	antisense	0.0242398	-1.70127
ENSG00000078804.8	TP53INP2	protein_coding	0.000627604	-2.19647
ENSG00000259399.1	TGIF2-C20orf24	protein_coding	0.000444957	-3.12168
ENSG00000053438.7	NNAT	protein_coding	0.0415044	-1.07007
ENSG00000232493.2	RPL12P11	pseudogene	0.0416324	-1.34052
ENSG00000237788.1	RP5-1041C10.3	pseudogene	0.0286523	-1.61299
ENSG00000228663.1	PSMD10P1	pseudogene	0.00323178	-1.70349
ENSG00000124091.5	GCNT7	protein_coding	0.0165334	-1.42987
ENSG00000218018.2	RP4-800J21.3	antisense	0.00335288	-1.67224
ENSG00000243064.4	ABCC13	pseudogene	0.000968181	1.23588
ENSG00000154642.6	C21orf91	protein_coding	0.0001393	1.59615
ENSG00000228817.3	BACH1-IT2	lincRNA	0.0340964	-1.04348
ENSG00000226501.2	USF1P1	pseudogene	0.00970995	-2.09133
ENSG00000159131.12	GART	protein_coding	0.00330596	1.00257
ENSG00000159140.13	SON	protein_coding	0.0142284	-1.00979
ENSG00000160201.7	U2AF1	protein_coding	0.00834015	-1.28169
ENSG00000142178.7	SIK1	protein_coding	0.000188576	-1.97075
ENSG00000215458.4	AP001053.11	antisense	0.00898948	1.44309
ENSG00000213440.2	H2AFZP1	pseudogene	0.0177899	-2.10829
ENSG00000160223.12	ICOSLG	protein_coding	0.032142	-2.24725
ENSG00000269220.1	LINC00528	lincRNA	0.00480258	-1.21719
ENSG00000223461.1	AC004471.9	antisense	0.00381746	-1.77023
ENSG00000070010.14	UFD1L	protein_coding	0.00761606	-1.16294
ENSG00000236003.1	AC007050.17	antisense	0.00100657	-2.1112
ENSG00000128271.15	ADORA2A	protein_coding	0.00618122	-1.27192
ENSG00000178803.6	ADORA2A-AS1	antisense	0.00317506	-2.64309
ENSG00000242114.1	MTFP1	protein_coding	0.00589345	-1.15573
ENSG00000233360.4	Z83844.1	antisense	0.00203035	-1.82885
ENSG00000229598.1	PRDX3P1	pseudogene	0.0095754	-1.58118
ENSG00000257034.1	AL021707.2	pseudogene	0.0331695	4.19328
ENSG00000243811.3	APOBEC3D	protein_coding	0.00487862	1.42381
ENSG00000239713.3	APOBEC3G	protein_coding	0.000255551	1.13177
ENSG00000228599.1	RP6-11O7.2	pseudogene	0.00212911	-1.64224
ENSG00000230071.2	RPL4P6	pseudogene	0.0265154	-1.01847
ENSG00000231993.1	RP1-85F18.5	antisense	0.0183526	-1.3284
ENSG00000184068.2	RP5-821D11.7	antisense	0.0149933	-1.05964
ENSG00000159958.3	TNFRSF13C	protein_coding	0.0146913	-1.32346
ENSG00000183172.8	SMDT1	protein_coding	0.00319998	-1.21706
ENSG00000226328.2	CTA-217C2.1	lincRNA	0.00746274	1.1044
ENSG00000260708.1	CTA-29F11.1	antisense	0.0116589	-1.22359
ENSG00000236867.1	RP3-522J7.5	pseudogene	0.00969427	-3.1138
ENSG00000198355.4	PIM3	protein_coding	0.00138904	-1.02517
ENSG00000273188.1	RP3-402G11.25	antisense	0.00577333	-1.22767
ENSG00000177989.9	ODF3B	protein_coding	0.0307382	1.22484
ENSG00000273272.1	CTA-384D8.34	lincRNA	0.046991	1.24316
ENSG00000130150.7	MOSPD2	protein_coding	0.00503564	1.10399
ENSG00000120280.5	CXorf21	protein_coding	0.0039087	1.32598
ENSG00000241886.1	RP11-242C19.2	sense_intronic	0.0352273	1.06636
ENSG00000047597.5	XK	protein_coding	0.0117836	1.03874
ENSG00000230844.2	ZNF674-AS1	lincRNA	0.00659457	-1.16872
ENSG00000184596.4	AF207550.1	pseudogene	0.00697475	-1.63587
ENSG00000230673.3	PABPC1P3	pseudogene	0.0103983	-1.3536
ENSG00000187808.3	SOWAHD	protein_coding	0.00921441	2.38217
ENSG00000240143.1	RP4-753P9.3	3prime_overlapping_ncrna	0.0160541	-1.16282
ENSG00000221930.5	FAM45B	pseudogene	0.0026516	1.69149
ENSG00000173275.8	ZNF449	protein_coding	0.0311933	1.30603
ENSG00000155962.8	CLIC2	protein_coding	0.0227951	1.03825
ENSG00000185990.6	F8A3	protein_coding	0.039213	-1.11262
